# Supplementary material for: Aseismic Creep, Coseismic Slip, and Postseismic Relaxation on Faults in Volcanic Areas: The Case of Ischia Island
Source: MDPI journal article supplement (doi:10.3390/rs15071791), 2023-03-27
Supplement: s1 [file s1]

## Supplementary Materials

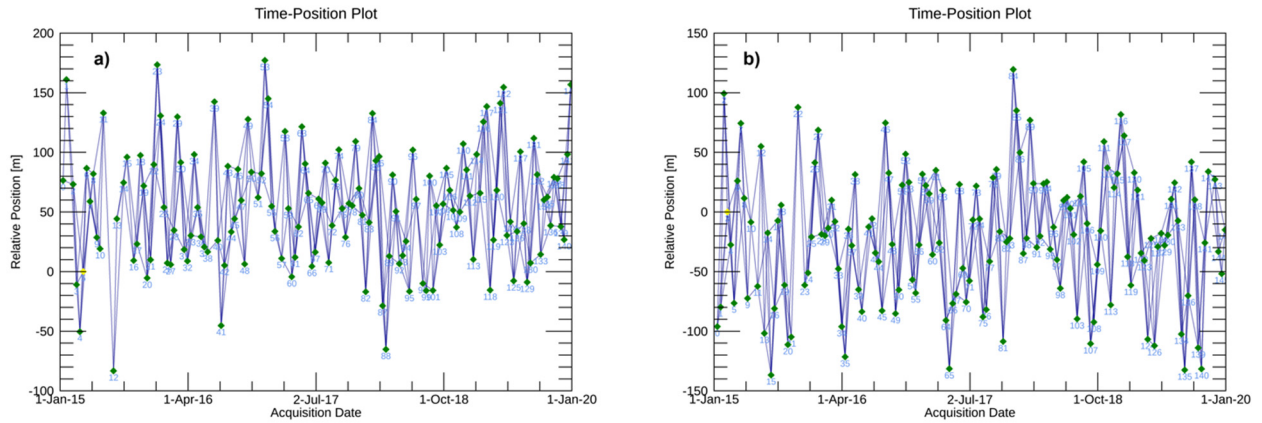

**Supplementary Figure S1.** Time-position plots displaying the interferograms network for descending (a) and ascending (b) Sentinel-1 SAR data.

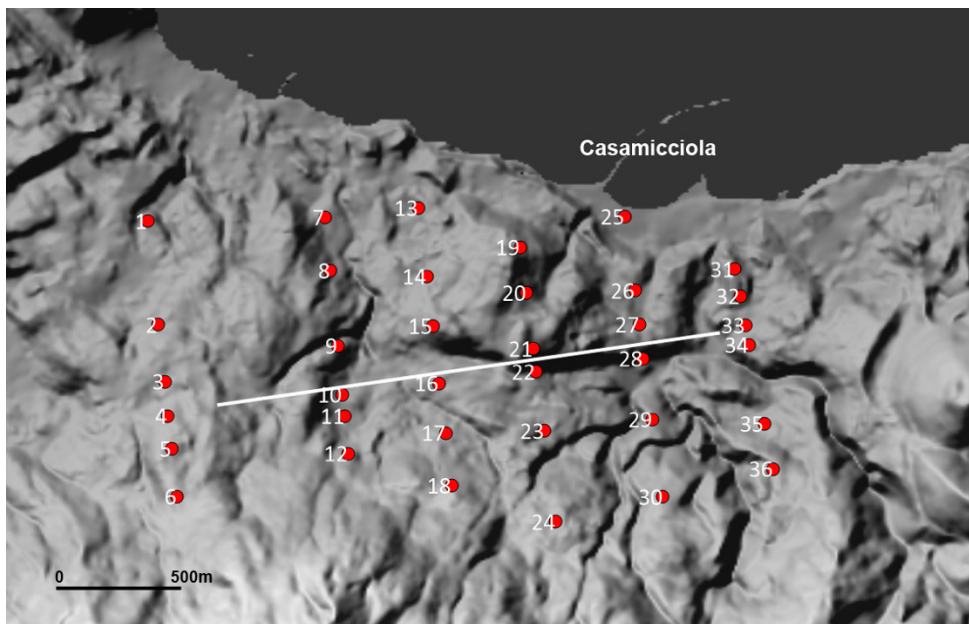

**Supplementary Figure S2.** Digital Terrain Model (source INGV Laboratorio Geomatica) of Ischia Island with indication of the preliminary points – located along 6 profiles perpendicular to surface fault trace (white line) [25] – for which is calculated the differential displacement for the period January 2015–December 2019.

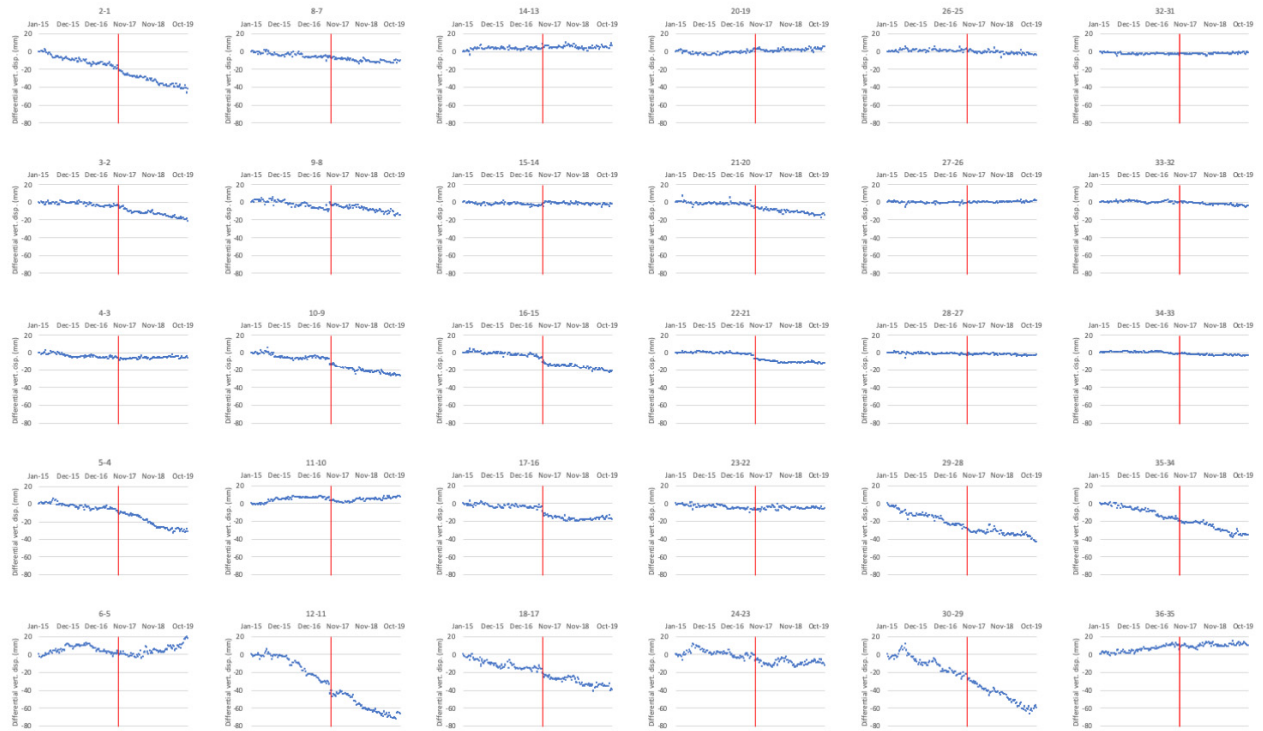

**Supplementary Figure S3.** Differential vertical displacement for the period January 2015–December 2019 between the couples of successive points located along the six profiles perpendicular to the CSf. For location of the points see Supplementary Figure 1.

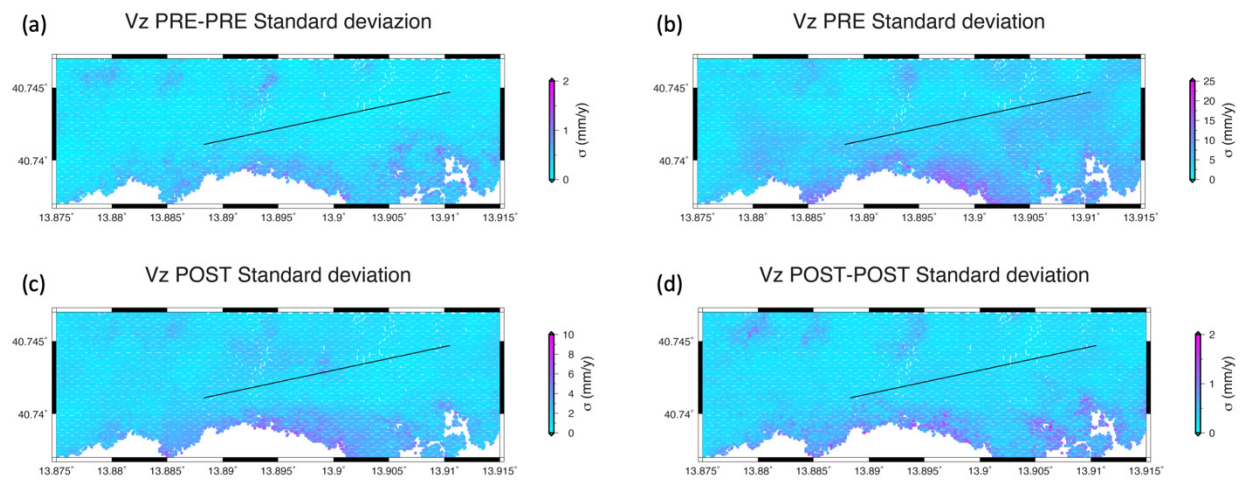

**Supplementary Figure S4.** Standard deviation for the velocity of the vertical ground motion as obtained from the analysis of DInSAR data, for the four time periods indicated in Table 1. (Figure 4).

## Vz POST–PRE Standard deviation

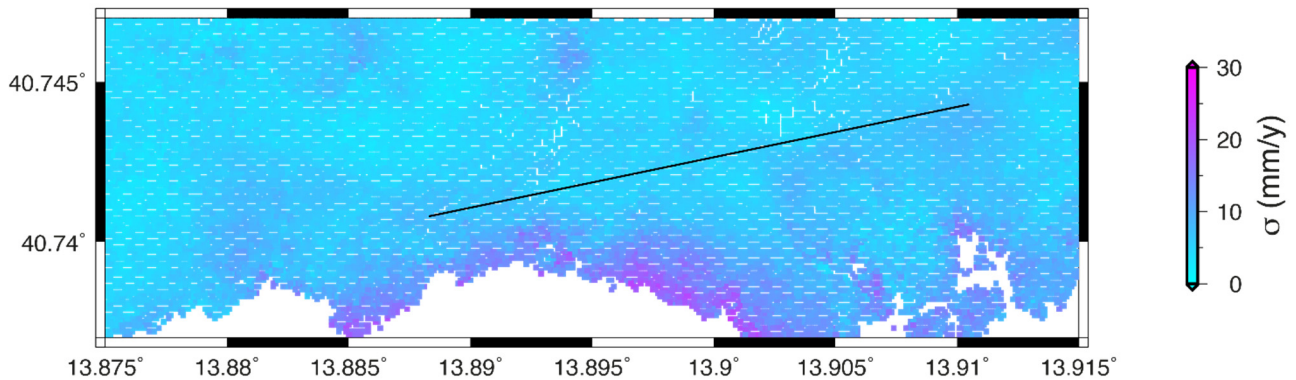

**Supplementary Figure S5.** Standard deviation for the difference (Figure 5) of the velocity of the vertical ground motion in the period immediately following the earthquake (POST period; Figure 4c) minus the velocity measured in the period preceding the event (PRE period; Figure 4b).

**Supplementary Table S1.** Historical seismicity in the island of Ischia (after [27] and [24]). Epicentral intensity and magnitude values from CPTI15 [23] are reported in parentheses. \*uncertain earthquake

| Year  | Epicentral area | Epicentral intensity MCS | Magnitude  | Damages                                                                               |
|-------|-----------------|--------------------------|------------|---------------------------------------------------------------------------------------|
| 1228* | CASAMICCIOLA    | 9-10                     | -          | 700 deaths, large landslide from Mt. Epomeo                                           |
| 1275  | NORTHERN SECTOR | 8-9<br>(8-9)             | -<br>(4.0) | Damages                                                                               |
| 1302  | EASTERN AREA    | 8                        |            | Many buildings collapse                                                               |
| 1557  | SOUTHEAST AREA  | 7-8<br>(6-7)             | -<br>(3.5) | Collapse of the Parish Church                                                         |
| 1762  | CASAMICCIOLA    | 7<br>(6-7)               | -<br>(3.5) | Damage to houses in Casamicciola                                                      |
| 1767  | EASTERN AREA    | 7-8<br>(6-7)             | -<br>(3.5) | Collapse of Rotaro's Church                                                           |
| 1769  | CASAMICCIOLA    | 8<br>-                   | -<br>-     | 7 deaths, serious damage in the upper part of Casamicciola                            |
| 1828  | CASAMICCIOLA    | 8-9<br>(8-9)             | -<br>(4.0) | 28 deaths, 50 injured, serious damage and collapses in the upper part of Casamicciola |
| 1841  | CASAMICCIOLA    | 7<br>(5-6)               | -<br>(3.3) | Cracks in the buildings                                                               |
| 1863  | CASAMICCIOLA    | 7<br>(6-7)               | -<br>(4.9) | Collapse of dry walls, small landslides from Mt. Epomeo                               |
| 1867  | CASAMICCIOLA    | 6-7<br>(4-5)             | -<br>(3.0) | Buildings damaged at Casamicciola                                                     |
| 1881  | CASAMICCIOLA    | 9<br>(9)                 | -<br>(4.1) | 129 deaths, many injured, many collapsed buildings at Casamicciola and Lacco Ameno    |

|      |              |              |                  |                                                                                 |
|------|--------------|--------------|------------------|---------------------------------------------------------------------------------|
| 1883 | CASAMICCIOLA | 11<br>(9-10) | 4.6-5.2<br>(4.3) | 2333 deaths, 762 injured, many collapsed at Casamicciola, Lacco Ameno and Forio |
|------|--------------|--------------|------------------|---------------------------------------------------------------------------------|
